# Supplementary material for: Metal-functionalized carbon nanotubes for biomass conversion: base-free highly efficient and recyclable catalysts for aerobic oxidation of 5-hydroxymethylfurfural
Source: Royal Society of Chemistry journal article supplement (doi:10.1039/c9nj01555h), 2019-01-01
Supplement: c9nj01555h1.pdf [file c9nj01555h1.pdf]

## Metal Functionalized Carbon Nanotubes for Biomass Conversion: Base-Free Highly efficient and Recyclable Catalysts for Aerobic Oxidation of 5-Hydroxymethylfurfural

Poonam Sharma, Mohit Solanki, and Rakesh K. Sharma

Indian Institute of Technology Jodhpur

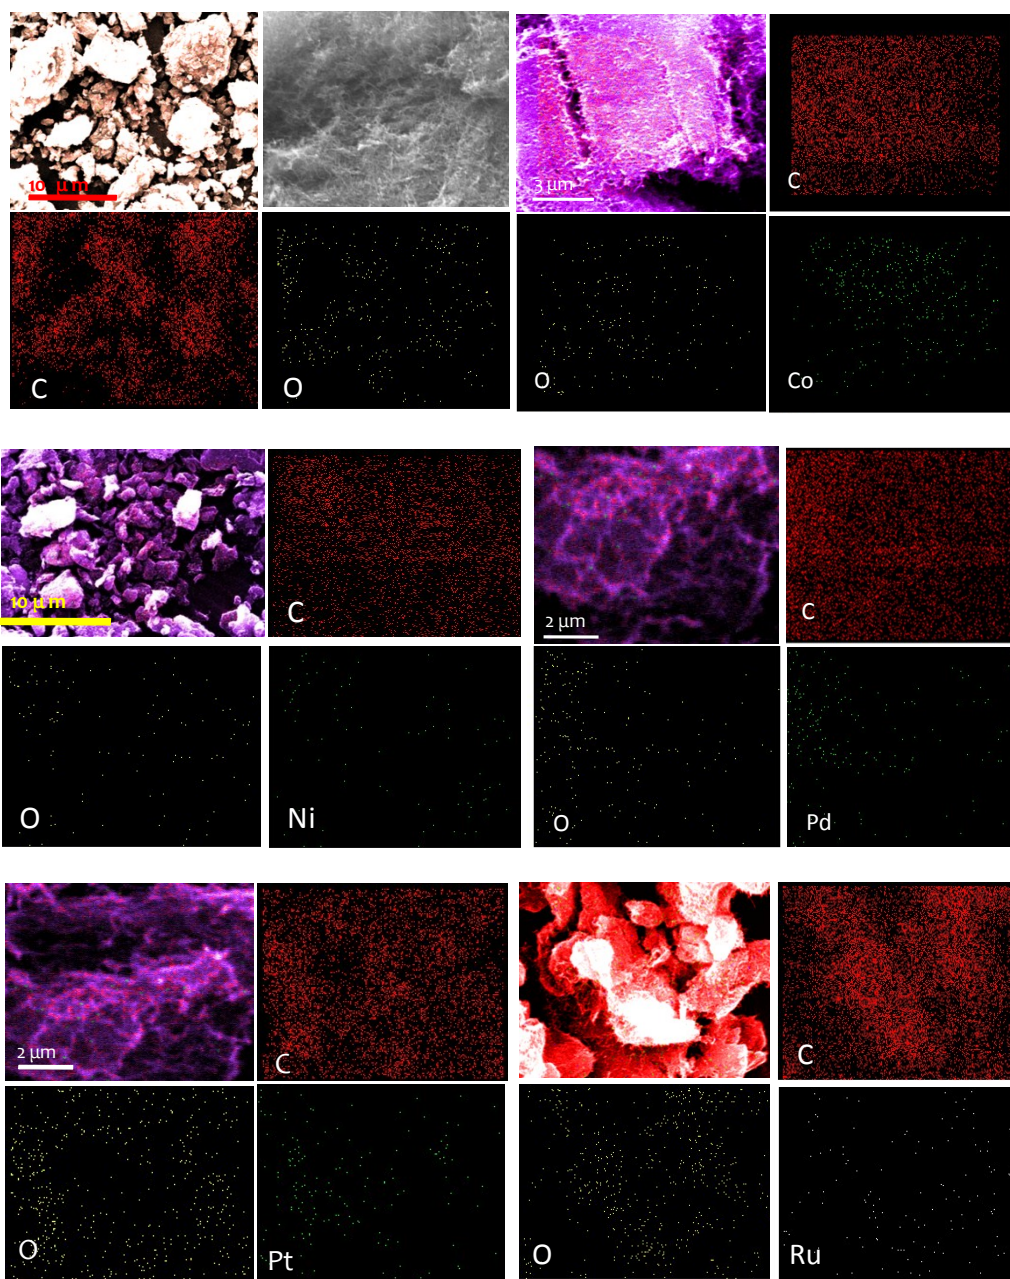

Figure S1. EDX mapping of (a) Functionalized CNT (b) Co/CNT (c) Ni/CNT (d) Pd/CNT (e) Pt/CNT, and (f) Ru/CNT

## NMR spectra

### FDCA

**NMR-** Nuclear magnetic resonance spectra ( $^1\text{H}$  NMR and  $^{13}\text{C}$  NMR) are carried on a Bruker spectrometer operating at 500 MHz in  $\text{D}_2\text{O}$  (10%) for locking.  $^1\text{H}$  NMR (500 MHz,  $\text{D}_2\text{O}$ , 298K): 7.08 (2H, s, furan-H);  $^{13}\text{C}$  NMR: 163.40, 148.32, 117.92 ppm<sup>[1]</sup>

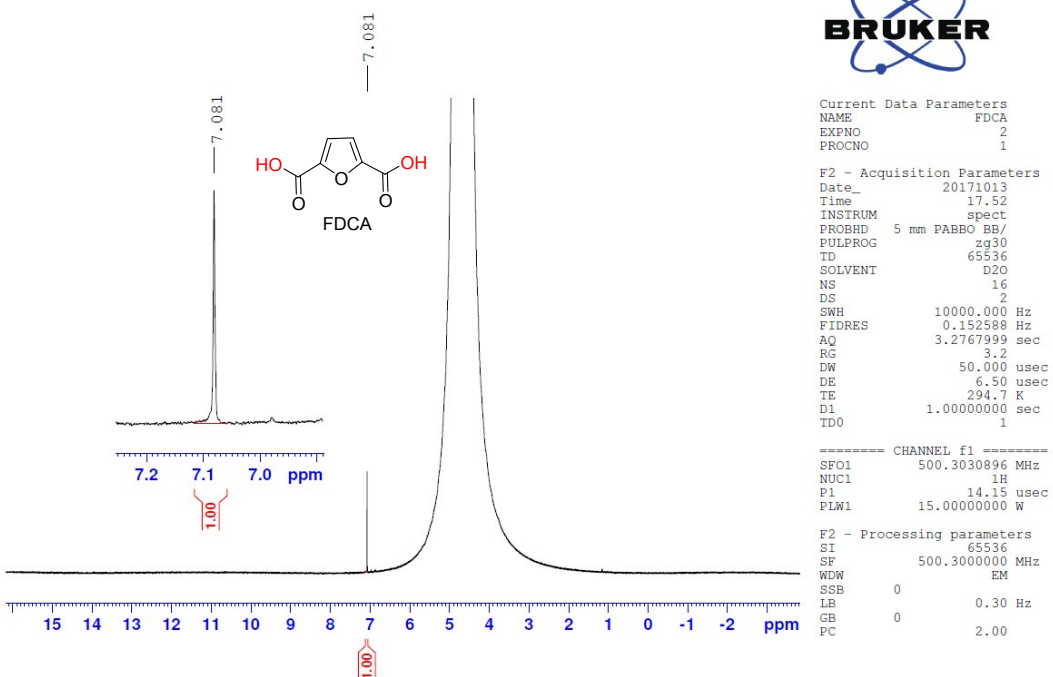

Figure S2.  $^1\text{H}$ -NMR spectrum of purified FDCA

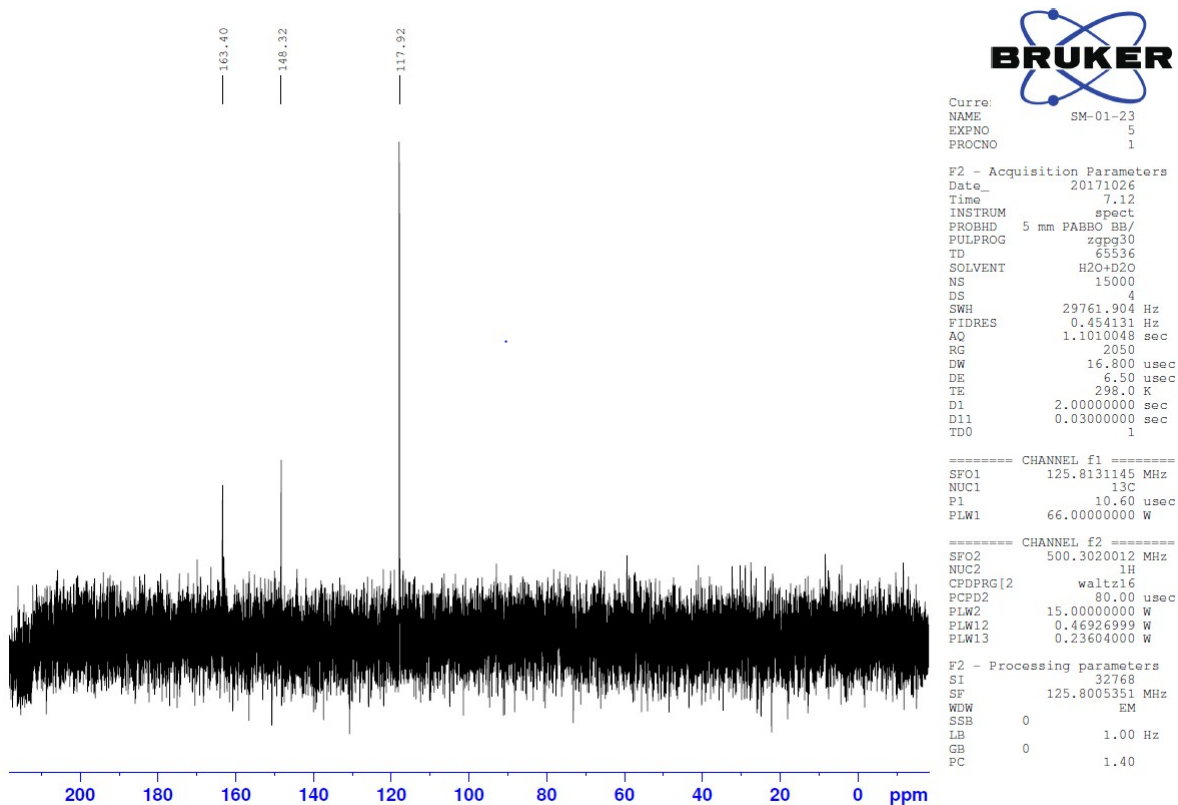

Figure S3.  $^{13}\text{C}$ -NMR of purified FDCA.

### DFF

$^1\text{H}$  NMR (500 MHz,  $\text{D}_2\text{O}$ , 298K): 9.5 (2H, s, CHO), 7.4 (2H, s, Furan-H);  $^{13}\text{C}$  NMR: 179.40, 154.6, 119.35 ppm<sup>[2]</sup>

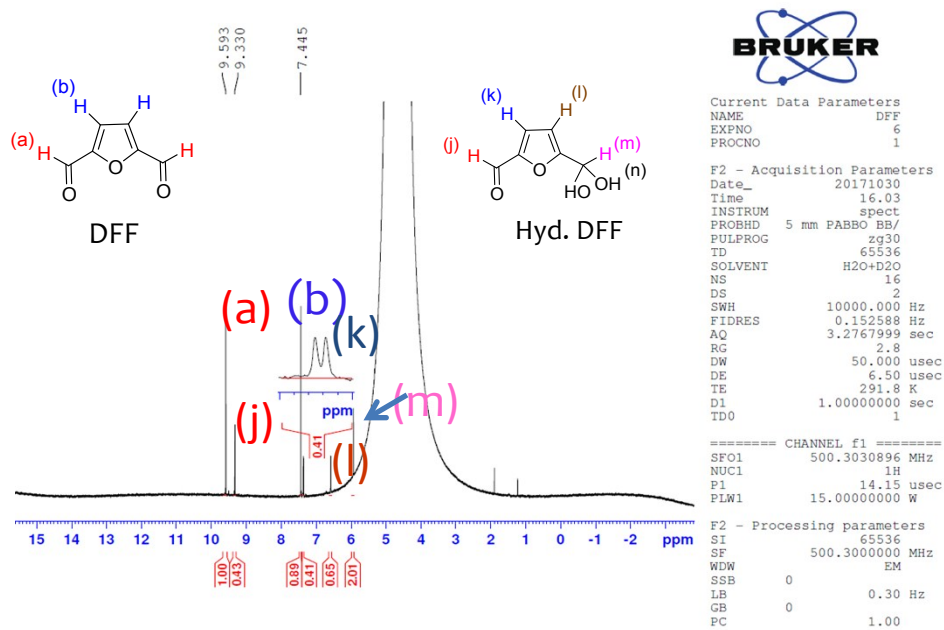

Figure S4. <sup>1</sup>H-NMR spectrum of DFF and hydrated DFF.

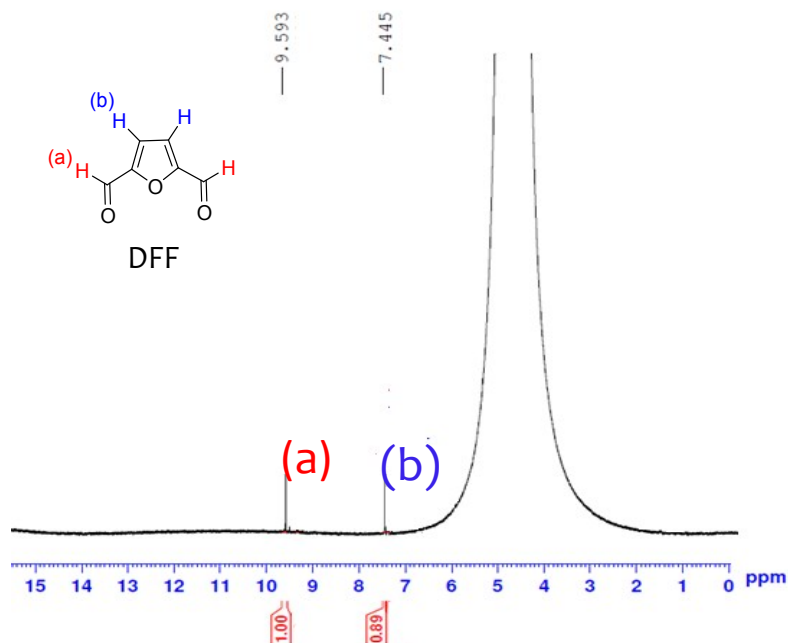

Figure S5. <sup>1</sup>H-NMR spectrum of purified DFF.

### HPLC chromatogram

| S.N. | Parameters                                          | Values                                |
|------|-----------------------------------------------------|---------------------------------------|
| 1.   | Temperature                                         | 40° C                                 |
| 2.   | Flow rate                                           | 1 ml/min                              |
| 3.   | Detection<br>( Wave length)                         | 284 nm                                |
| 4.   | Solvent ratio                                       | 5:95 :: Acetonitrile:H <sub>2</sub> O |
| 5.   | Injection volume                                    | 20 µl                                 |
| 6.   | Reverse phased C18 Column<br>5.0 µm, 100 Å (Waters) | (4.6mm * 250 mm) Column               |

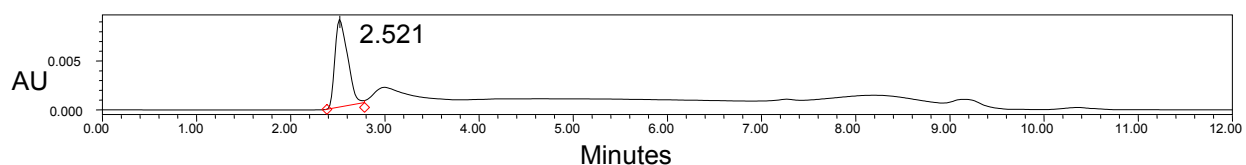

| E.No. | Name | Retention Time | % Area |
|-------|------|----------------|--------|
| 1     | FDCA | 2.52           | 97.6   |
| 2.    | FFCA | 3.0            | 1.4    |
| 3.    | DFF  | 8.30           | 1.0    |

Figure S6. HPLC chromatogram of FDCA at optimized reaction condition.

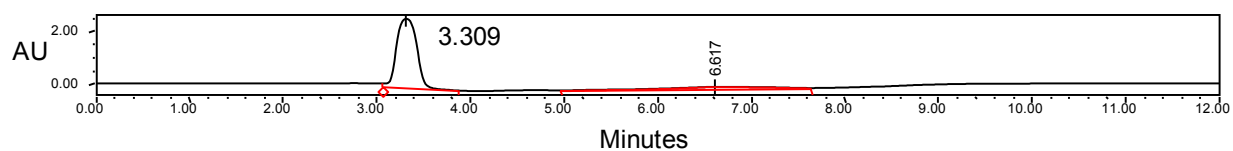

|   | Name | Retention Time | % Area |
|---|------|----------------|--------|
| 1 | FFCA | 3.309          | 86.82  |
| 2 | HMF  | 6.617          | 13.18  |

Figure S7. HPLC chromatogram of FFCA in the presence of functionalized CNT.

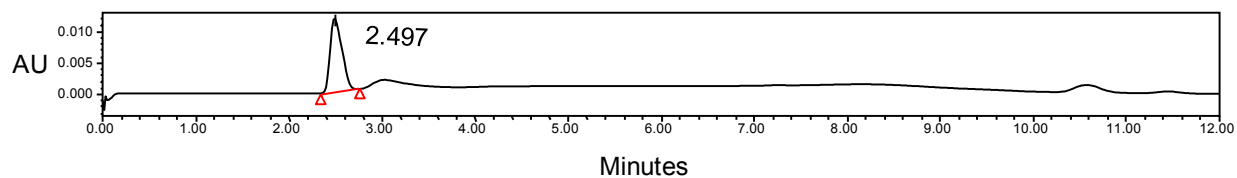

| E.No. | Name    | Retention Time | % Area |
|-------|---------|----------------|--------|
| 1     | FDCA    | 2.49           | 97.8   |
| 2.    | FFCA    | 3.0            | 1.3    |
| 3.    | Unknown | 10.9           | 0.9    |

Figure S8. HPLC chromatogram of FDCA over Pt/CNT catalyst.

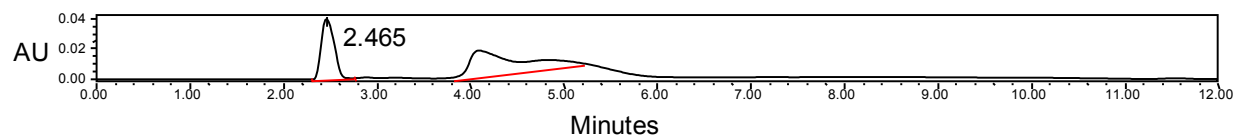

| E.No. | Name    | Retention Time | % Area |
|-------|---------|----------------|--------|
| 1     | FDCA    | 2.46           | 95.6   |
| 2.    | FFCA    | 3.9            | 2.4    |
| 3.    | Unknown | 5.9            | 2.0    |

Figure S 9. HPLC chromatogram of FDCA over Pd/CNT catalyst.

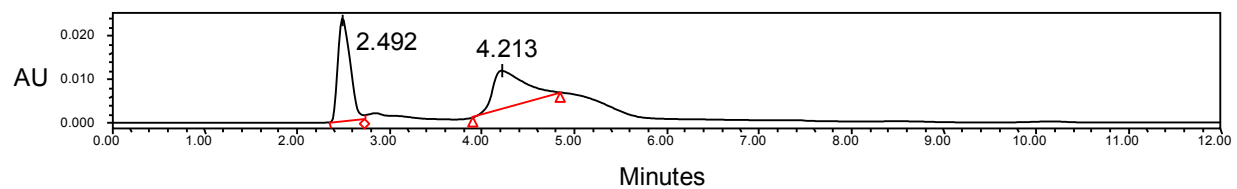

| E.No. | Name    | Retention Time | % Area |
|-------|---------|----------------|--------|
| 1     | FDCA    | 2.49           | 92.8   |
| 2.    | FFCA    | 4.2            | 6.1    |
| 3.    | Unknown | 5.6            | 1.1    |

Figure S10. HPLC chromatogram of FDCA over Ru/CNT catalyst.

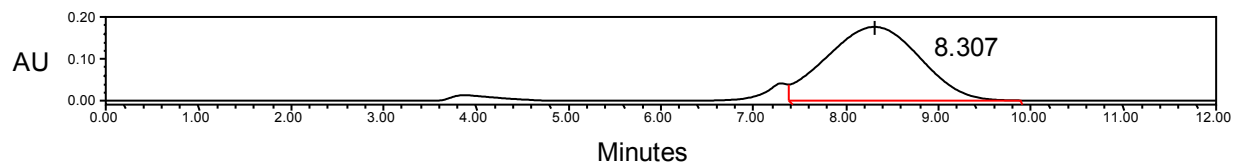

| E.No. | Name | Retention Time | % Area |
|-------|------|----------------|--------|
| 1     | FFCA | 3.9            | 1.1    |
| 2.    | HMF  | 7.3            | 2.5    |
| 3.    | DFF  | 8.30           | 96.4   |

Figure S11. HPLC chromatogram of DFF over Ni/CNT catalyst.

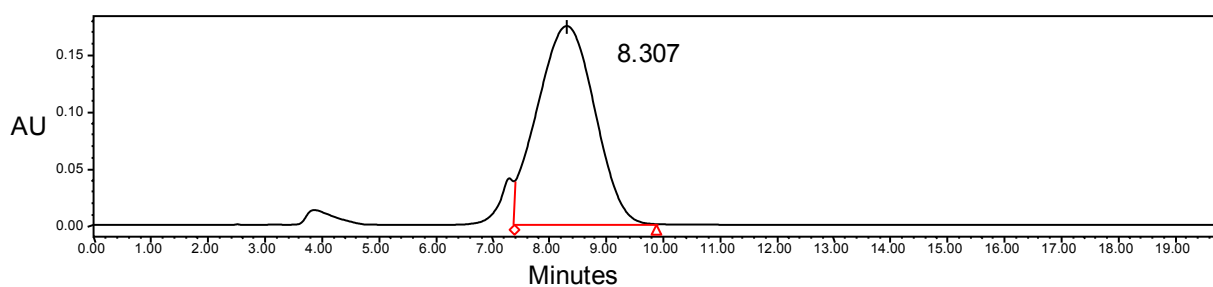

| E.No. | Name | Retention Time | % Area |
|-------|------|----------------|--------|
| 1     | FFCA | 3.9            | 3.1    |
| 2.    | HMF  | 7.3            | 4.5    |
| 3.    | DFF  | 8.30           | 92.4   |

Figure S12. HPLC chromatogram of DFF over Co/CNT catalyst.

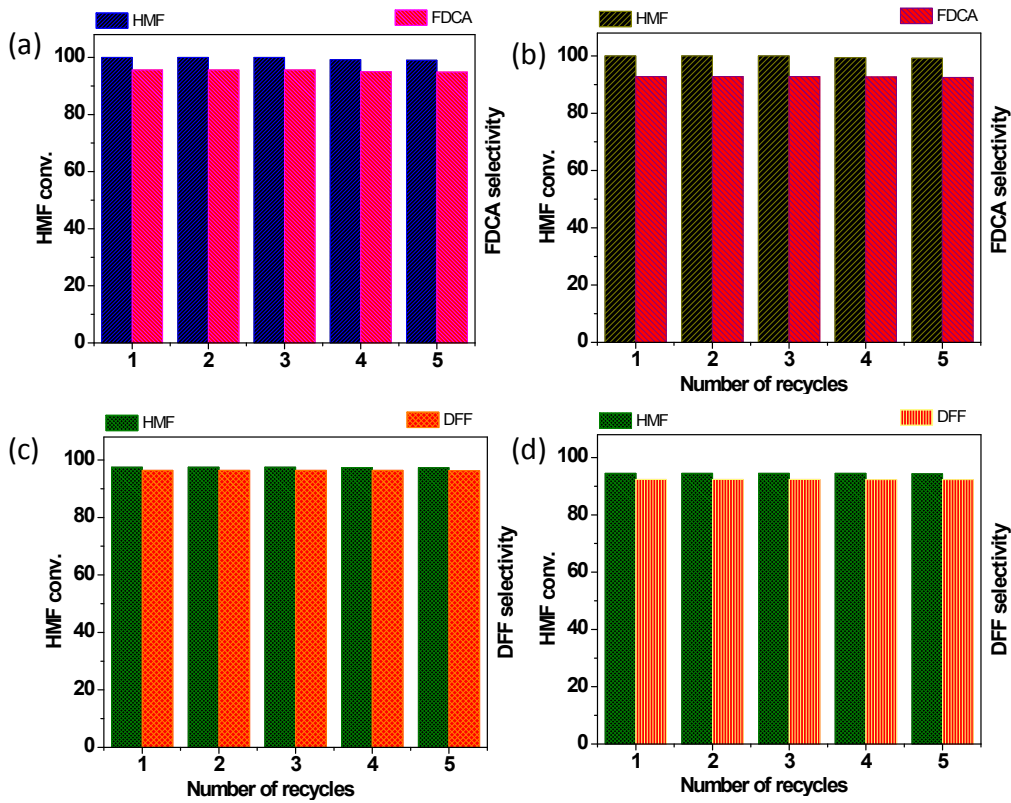

Figure S13. Recyclability of catalysts (a) Pd/CNT (b) Ru/CNT (c) Co/CNT, and Ni/CNT.

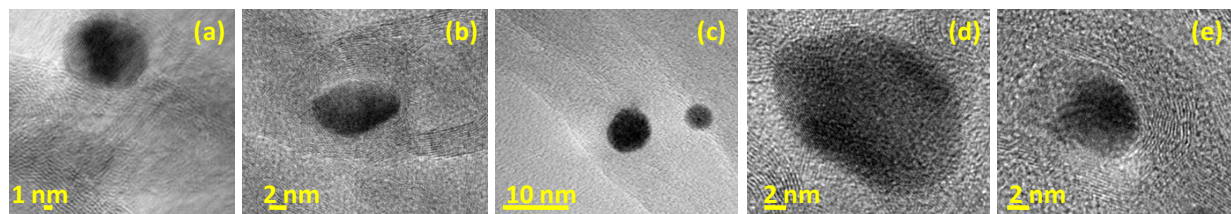

Figure S14. TEM images of recycled (a) Pd/CNT, (b) Ru/CNT, (c) Pt/CNT, (d) Co/CNT, and (e) Ni/CNT after 5 cycles.



**Table S1. Literature review.**

| Catalysts                                             | Condition (solvent ,Temp ,Pressure)                         | FDCA Yield (%)                                                             | DFF Yield (%) | DOI  |
|-------------------------------------------------------|-------------------------------------------------------------|----------------------------------------------------------------------------|---------------|------|
| (5%) Pt/C                                             | Alkaline water, 100°C, 40 bar                               | 99                                                                         | -             | [3]  |
| Au –Pd (0.96%)/ CNT NPs                               | Water, 100°C, 1 MPa pressure O <sub>2</sub> bar             | 96                                                                         | -             | [4]  |
| (3 %)Pt /C                                            | Neutral /acidic condition, , 21.2°C                         | 86 (Selectivity)                                                           | -             | [5]  |
| Pt/C, Pd/C and Au/C                                   | NaOH, 22°C, 690 kPa O <sub>2</sub>                          | 79                                                                         | -             | [6]  |
| Au/TiO <sub>2</sub>                                   | Methanol, 130°C, 4 bar O <sub>2</sub>                       | -                                                                          | -             | [7]  |
| Co/Mn/ Br                                             | H <sub>2</sub> O/HCl, 180°C, 30 bar                         | 90                                                                         | -             | [8]  |
| Ru (OH) <sub>2</sub> / La <sub>2</sub> O <sub>3</sub> | ionic liquid , 100°C, 30 bar                                | 48                                                                         | -             | [9]  |
| (4%) Ru/MnCo <sub>2</sub> O <sub>4</sub>              | Water, 120°C, 2.4 MPa                                       | 99.1                                                                       | 0             | [10] |
| (5%) Ru/C Mg(OH) <sub>2</sub>                         | Water, 110°C, 1.0 MPa O <sub>2</sub>                        | 97.3                                                                       | -             | [11] |
| (5%)Pt/C                                              | Water (20 ml ), 50°C, 10 bar O <sub>2</sub>                 | 80                                                                         | -             | [12] |
| Pd modified Au on Carbon                              | 60°C, 3 MPa O <sub>2</sub>                                  | >99                                                                        | -             | [13] |
| Pd/ C@ Fe <sub>2</sub> O <sub>3</sub>                 | H <sub>2</sub> O, 80°C, O <sub>2</sub> bubbling (20 ml/min) | 86.7                                                                       | -             | [14] |
| Pt/ non- reducible support                            | 140°C, 1 bar                                                | 96 in presence of ( Pt-Al <sub>2</sub> O <sub>3</sub> , TiO <sub>2</sub> ) | -             | [15] |
| K-10 clay-Mo                                          | toluene ,110°C ( O <sub>2</sub> flow)                       | -                                                                          | -             | [16] |
| Au-Cu NPs                                             | NaOH, 60°C, 60°C                                            | 99                                                                         | -             | [17] |
| Au-CeO <sub>2</sub>                                   | Water ,NaOH, 65°C, 10 bar O <sub>2</sub>                    | >99                                                                        | -             | [18] |
| Pd/HT                                                 | Water, 110°C, O <sub>2</sub> bubbling (100 ml/min)          | 92.4                                                                       | -             | [19] |

|                                                            |                                                                                |      |    |      |
|------------------------------------------------------------|--------------------------------------------------------------------------------|------|----|------|
| Au/C                                                       | water, Na <sub>2</sub> CO <sub>3</sub> (0.4 mmol), 90°C, 10 bar O <sub>2</sub> | 75   | -  | [20] |
| Ni <sub>0.90</sub> Pd <sub>0.10</sub> /Mg(OH) <sub>2</sub> | water, Na <sub>2</sub> CO <sub>3</sub> , 100°C                                 | 83   | -  | [21] |
| Titania NPs in aqueous medium                              | H <sub>2</sub> O, 70°C, 1 atm O <sub>2</sub>                                   | 23   | 88 | [22] |
| Au-Pd alloy NPs                                            | Water, 90°C, atm O <sub>2</sub>                                                | 99   | -  | [23] |
| CeCP @Pt                                                   | H <sub>2</sub> O, 70°C, atp                                                    | 96.2 | -  | [24] |
| Au Nano cluster                                            | H <sub>2</sub> O, 60°C, 0.3 M Pa O <sub>2</sub>                                | >99  | -  | [25] |
| (5%)Pt/CNT                                                 | H <sub>2</sub> O, O <sub>2</sub> , (0.5 Mpa), 368 K                            | 96   | -  | [26] |

**Table S2. Average particle size and histograms of catalysts.**

| Catalysts | Average particle size (nm) | Histograms                                                                                                                                                                                                                                                                                                                                                                                                                                                                                                             |
|-----------|----------------------------|------------------------------------------------------------------------------------------------------------------------------------------------------------------------------------------------------------------------------------------------------------------------------------------------------------------------------------------------------------------------------------------------------------------------------------------------------------------------------------------------------------------------|
| Pd/CNT    | 12.4                       | <p>Detailed description: The histogram for Pd/CNT shows a distribution of particle sizes. The x-axis represents particle size in nanometers (nm), ranging from 0 to 40 with major ticks every 20 units. The y-axis represents frequency in percent, ranging from 0 to 20 with major ticks every 10 units. The distribution is unimodal and slightly right-skewed, with the highest frequency (approximately 22%) occurring in the 5-10 nm range. Other smaller peaks are visible at approximately 15 nm and 35 nm.</p> |
| Ru/CNT    | 6.4                        | <p>Detailed description: The histogram for Ru/CNT shows a distribution of particle sizes. The x-axis represents particle size in nanometers (nm), ranging from 0 to 20 with major ticks every 5 units. The y-axis represents frequency in percent, ranging from 0 to 18 with major ticks every 2 units. The distribution is unimodal and right-skewed, with the highest frequency (approximately 17%) occurring in the 5-10 nm range. There are also small peaks at approximately 10 nm and 20 nm.</p>                 |
| Pt/CNT    | 3.4                        | <p>Detailed description: The histogram for Pt/CNT shows a distribution of particle sizes. The x-axis represents particle size in nanometers (nm), ranging from 0 to 16 with major ticks every 2 units. The y-axis represents frequency in percent, ranging from 0 to 10 with major ticks every 5 units. The distribution is unimodal and right-skewed, with the highest frequency (approximately 10%) occurring in the 4-6 nm range. There are also small peaks at approximately 2 nm and 14 nm.</p>                   |
| Co/CNT    | 15.2                       | <p>Detailed description: The histogram for Co/CNT shows a bimodal distribution of particle sizes. The x-axis represents particle size in nanometers (nm), ranging from 0 to 35 with major ticks every 5 units. The y-axis represents frequency in percent, ranging from 0 to 6 with major ticks every 1 unit. There are two main peaks: one at approximately 5-10 nm (frequency ~6%) and another at approximately 20-25 nm (frequency ~6%). There are also smaller peaks at approximately 10 nm, 15 nm, and 30 nm.</p> |

| Ni/CNT             | 5.9           | 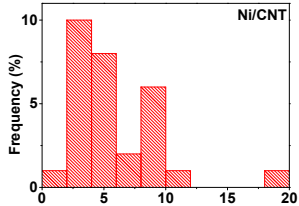 <p>Ni/CNT</p> <table border="1"> <caption>Frequency Distribution of Ni/CNT Particle Sizes</caption> <thead> <tr> <th>Particle size (nm)</th> <th>Frequency (%)</th> </tr> </thead> <tbody> <tr><td>0-1</td><td>1</td></tr> <tr><td>1-2</td><td>10</td></tr> <tr><td>2-3</td><td>8</td></tr> <tr><td>3-4</td><td>2</td></tr> <tr><td>4-5</td><td>6</td></tr> <tr><td>5-6</td><td>1</td></tr> <tr><td>6-7</td><td>1</td></tr> <tr><td>7-8</td><td>1</td></tr> <tr><td>8-9</td><td>1</td></tr> <tr><td>9-10</td><td>1</td></tr> <tr><td>10-11</td><td>1</td></tr> <tr><td>11-12</td><td>1</td></tr> <tr><td>12-13</td><td>1</td></tr> <tr><td>13-14</td><td>1</td></tr> <tr><td>14-15</td><td>1</td></tr> <tr><td>15-16</td><td>1</td></tr> <tr><td>16-17</td><td>1</td></tr> <tr><td>17-18</td><td>1</td></tr> <tr><td>18-19</td><td>1</td></tr> <tr><td>19-20</td><td>1</td></tr> </tbody> </table> | Particle size (nm) | Frequency (%) | 0-1 | 1 | 1-2 | 10 | 2-3 | 8 | 3-4 | 2 | 4-5 | 6 | 5-6 | 1 | 6-7 | 1 | 7-8 | 1 | 8-9 | 1 | 9-10 | 1 | 10-11 | 1 | 11-12 | 1 | 12-13 | 1 | 13-14 | 1 | 14-15 | 1 | 15-16 | 1 | 16-17 | 1 | 17-18 | 1 | 18-19 | 1 | 19-20 | 1 |
|--------------------|---------------|----------------------------------------------------------------------------------------------------------------------------------------------------------------------------------------------------------------------------------------------------------------------------------------------------------------------------------------------------------------------------------------------------------------------------------------------------------------------------------------------------------------------------------------------------------------------------------------------------------------------------------------------------------------------------------------------------------------------------------------------------------------------------------------------------------------------------------------------------------------------------------------------------------------------------------------------------------------------------------------|--------------------|---------------|-----|---|-----|----|-----|---|-----|---|-----|---|-----|---|-----|---|-----|---|-----|---|------|---|-------|---|-------|---|-------|---|-------|---|-------|---|-------|---|-------|---|-------|---|-------|---|-------|---|
| Particle size (nm) | Frequency (%) |                                                                                                                                                                                                                                                                                                                                                                                                                                                                                                                                                                                                                                                                                                                                                                                                                                                                                                                                                                                        |                    |               |     |   |     |    |     |   |     |   |     |   |     |   |     |   |     |   |     |   |      |   |       |   |       |   |       |   |       |   |       |   |       |   |       |   |       |   |       |   |       |   |
| 0-1                | 1             |                                                                                                                                                                                                                                                                                                                                                                                                                                                                                                                                                                                                                                                                                                                                                                                                                                                                                                                                                                                        |                    |               |     |   |     |    |     |   |     |   |     |   |     |   |     |   |     |   |     |   |      |   |       |   |       |   |       |   |       |   |       |   |       |   |       |   |       |   |       |   |       |   |
| 1-2                | 10            |                                                                                                                                                                                                                                                                                                                                                                                                                                                                                                                                                                                                                                                                                                                                                                                                                                                                                                                                                                                        |                    |               |     |   |     |    |     |   |     |   |     |   |     |   |     |   |     |   |     |   |      |   |       |   |       |   |       |   |       |   |       |   |       |   |       |   |       |   |       |   |       |   |
| 2-3                | 8             |                                                                                                                                                                                                                                                                                                                                                                                                                                                                                                                                                                                                                                                                                                                                                                                                                                                                                                                                                                                        |                    |               |     |   |     |    |     |   |     |   |     |   |     |   |     |   |     |   |     |   |      |   |       |   |       |   |       |   |       |   |       |   |       |   |       |   |       |   |       |   |       |   |
| 3-4                | 2             |                                                                                                                                                                                                                                                                                                                                                                                                                                                                                                                                                                                                                                                                                                                                                                                                                                                                                                                                                                                        |                    |               |     |   |     |    |     |   |     |   |     |   |     |   |     |   |     |   |     |   |      |   |       |   |       |   |       |   |       |   |       |   |       |   |       |   |       |   |       |   |       |   |
| 4-5                | 6             |                                                                                                                                                                                                                                                                                                                                                                                                                                                                                                                                                                                                                                                                                                                                                                                                                                                                                                                                                                                        |                    |               |     |   |     |    |     |   |     |   |     |   |     |   |     |   |     |   |     |   |      |   |       |   |       |   |       |   |       |   |       |   |       |   |       |   |       |   |       |   |       |   |
| 5-6                | 1             |                                                                                                                                                                                                                                                                                                                                                                                                                                                                                                                                                                                                                                                                                                                                                                                                                                                                                                                                                                                        |                    |               |     |   |     |    |     |   |     |   |     |   |     |   |     |   |     |   |     |   |      |   |       |   |       |   |       |   |       |   |       |   |       |   |       |   |       |   |       |   |       |   |
| 6-7                | 1             |                                                                                                                                                                                                                                                                                                                                                                                                                                                                                                                                                                                                                                                                                                                                                                                                                                                                                                                                                                                        |                    |               |     |   |     |    |     |   |     |   |     |   |     |   |     |   |     |   |     |   |      |   |       |   |       |   |       |   |       |   |       |   |       |   |       |   |       |   |       |   |       |   |
| 7-8                | 1             |                                                                                                                                                                                                                                                                                                                                                                                                                                                                                                                                                                                                                                                                                                                                                                                                                                                                                                                                                                                        |                    |               |     |   |     |    |     |   |     |   |     |   |     |   |     |   |     |   |     |   |      |   |       |   |       |   |       |   |       |   |       |   |       |   |       |   |       |   |       |   |       |   |
| 8-9                | 1             |                                                                                                                                                                                                                                                                                                                                                                                                                                                                                                                                                                                                                                                                                                                                                                                                                                                                                                                                                                                        |                    |               |     |   |     |    |     |   |     |   |     |   |     |   |     |   |     |   |     |   |      |   |       |   |       |   |       |   |       |   |       |   |       |   |       |   |       |   |       |   |       |   |
| 9-10               | 1             |                                                                                                                                                                                                                                                                                                                                                                                                                                                                                                                                                                                                                                                                                                                                                                                                                                                                                                                                                                                        |                    |               |     |   |     |    |     |   |     |   |     |   |     |   |     |   |     |   |     |   |      |   |       |   |       |   |       |   |       |   |       |   |       |   |       |   |       |   |       |   |       |   |
| 10-11              | 1             |                                                                                                                                                                                                                                                                                                                                                                                                                                                                                                                                                                                                                                                                                                                                                                                                                                                                                                                                                                                        |                    |               |     |   |     |    |     |   |     |   |     |   |     |   |     |   |     |   |     |   |      |   |       |   |       |   |       |   |       |   |       |   |       |   |       |   |       |   |       |   |       |   |
| 11-12              | 1             |                                                                                                                                                                                                                                                                                                                                                                                                                                                                                                                                                                                                                                                                                                                                                                                                                                                                                                                                                                                        |                    |               |     |   |     |    |     |   |     |   |     |   |     |   |     |   |     |   |     |   |      |   |       |   |       |   |       |   |       |   |       |   |       |   |       |   |       |   |       |   |       |   |
| 12-13              | 1             |                                                                                                                                                                                                                                                                                                                                                                                                                                                                                                                                                                                                                                                                                                                                                                                                                                                                                                                                                                                        |                    |               |     |   |     |    |     |   |     |   |     |   |     |   |     |   |     |   |     |   |      |   |       |   |       |   |       |   |       |   |       |   |       |   |       |   |       |   |       |   |       |   |
| 13-14              | 1             |                                                                                                                                                                                                                                                                                                                                                                                                                                                                                                                                                                                                                                                                                                                                                                                                                                                                                                                                                                                        |                    |               |     |   |     |    |     |   |     |   |     |   |     |   |     |   |     |   |     |   |      |   |       |   |       |   |       |   |       |   |       |   |       |   |       |   |       |   |       |   |       |   |
| 14-15              | 1             |                                                                                                                                                                                                                                                                                                                                                                                                                                                                                                                                                                                                                                                                                                                                                                                                                                                                                                                                                                                        |                    |               |     |   |     |    |     |   |     |   |     |   |     |   |     |   |     |   |     |   |      |   |       |   |       |   |       |   |       |   |       |   |       |   |       |   |       |   |       |   |       |   |
| 15-16              | 1             |                                                                                                                                                                                                                                                                                                                                                                                                                                                                                                                                                                                                                                                                                                                                                                                                                                                                                                                                                                                        |                    |               |     |   |     |    |     |   |     |   |     |   |     |   |     |   |     |   |     |   |      |   |       |   |       |   |       |   |       |   |       |   |       |   |       |   |       |   |       |   |       |   |
| 16-17              | 1             |                                                                                                                                                                                                                                                                                                                                                                                                                                                                                                                                                                                                                                                                                                                                                                                                                                                                                                                                                                                        |                    |               |     |   |     |    |     |   |     |   |     |   |     |   |     |   |     |   |     |   |      |   |       |   |       |   |       |   |       |   |       |   |       |   |       |   |       |   |       |   |       |   |
| 17-18              | 1             |                                                                                                                                                                                                                                                                                                                                                                                                                                                                                                                                                                                                                                                                                                                                                                                                                                                                                                                                                                                        |                    |               |     |   |     |    |     |   |     |   |     |   |     |   |     |   |     |   |     |   |      |   |       |   |       |   |       |   |       |   |       |   |       |   |       |   |       |   |       |   |       |   |
| 18-19              | 1             |                                                                                                                                                                                                                                                                                                                                                                                                                                                                                                                                                                                                                                                                                                                                                                                                                                                                                                                                                                                        |                    |               |     |   |     |    |     |   |     |   |     |   |     |   |     |   |     |   |     |   |      |   |       |   |       |   |       |   |       |   |       |   |       |   |       |   |       |   |       |   |       |   |
| 19-20              | 1             |                                                                                                                                                                                                                                                                                                                                                                                                                                                                                                                                                                                                                                                                                                                                                                                                                                                                                                                                                                                        |                    |               |     |   |     |    |     |   |     |   |     |   |     |   |     |   |     |   |     |   |      |   |       |   |       |   |       |   |       |   |       |   |       |   |       |   |       |   |       |   |       |   |

## References

1. J. Ma, Y. Pang, M. Wang, J. Xu, H. Ma, X. Nie, *Journal of Materials Chemistry*, **2012**, 22, 3457-3461.
2. J. Chen, J. Zhong, Y. Guo, L. Chen, *RSC Advances*, **2015**, 5, 5933-5940.
3. H. A. Rass, N. Essayem, M. Besson, *Green Chemistry*, **2013**, 15, 2240-2251.
4. X. Wan, C. Zhou, J. Chen, W. Deng, Q. Zhang, Y. Yang, Y. Wang, *ACS catalysis*, **2014**, 4, 2175-2185.
5. S. E. Davis, A. D. Benavidez, R. W. Gosselink, J. H. Bitter, K. P. De Jong, A. K. Datye, R. J. Davis, *Journal of Molecular Catalysis A: Chemical*, **2014**, 388, 123-132.
6. S. E. Davis, L. R. Houk, E. C. Tamargo, A. K. Datye, R. J. Davis, *Catalysis Today*, **2011**, 160, 55-60.
7. E. Taarning, I. S. Nielsen, K. Egeblad, R. Madsen, C. H. Christensen, *ChemSusChem: Chemistry & Sustainability Energy & Materials*, **2008**, 1, 75-78.
8. X. Zuo, P. Venkatasubramanian, D. H. Busch, B. Subramaniam, *ACS Sustainable Chemistry & Engineering*, **2016**, 4, 3659-3668.
9. T. Ståhlberg, E. Eyjólfssdóttir, Y. Y. Gorbanev, I. Sádaba, A. Riisager, *Catal Lett*, **2012**, 142, 1089-1097.
10. J. J. Morrison, J. M. Wasikewic, J. M. Koelewijn, L. Abu-Sen, H. Lan, A. Horn, S. G. Yeates.
11. W. Partenheimer, V. V. Grushin, *Adv Synth Catal*, **2001**, 343, 102-111.
12. K. R. Vuyyuru, P. Strasser, *Catalysis Today*, **2012**, 195, 144-154.
13. A. Villa, M. Schiavoni, S. Campisi, G. M. Veith, L. Prati, *ChemSusChem*, **2013**, 6, 609-612.
14. B. Liu, Y. Ren, Z. Zhang, *Green Chemistry*, **2015**, 17, 1610-1617.
15. R. Sahu, P. L. Dhepe, *Reaction Kinetics, Mechanisms and Catalysis*, **2014**, 112, 173-187.
16. Z. Zhang, B. Liu, K. Lv, J. Sun, K. Deng, *Green Chemistry*, **2014**, 16, 2762-2770.
17. T. Pasini, M. Piccinini, M. Blosi, R. Bonelli, S. Albonetti, N. Dimitratos, J. A. Lopez-Sanchez, M. Sankar, Q. He, C. J. Kiely, *Green chemistry*, **2011**, 13, 2091-2099.
18. O. Casanova, S. Iborra, A. Corma, *ChemSusChem: Chemistry & Sustainability Energy & Materials*, **2009**, 2, 1138-1144.
19. Y. Wang, K. Yu, D. Lei, W. Si, Y. Feng, L.-L. Lou, S. Liu, *ACS Sustainable Chemistry & Engineering*, **2016**, 4, 4752-4761.
20. B. Donoeva, N. Masoud, P. E. De Jongh, *ACS catalysis*, **2017**, 7, 4581-4591.
21. K. Gupta, R. K. Rai, S. K. Singh, *Inorganic Chemistry Frontiers*, **2017**, 4, 871-880.
22. D. Gupta, K. K. Pant, B. Saha, *Molecular Catalysis*, **2017**, 435, 182-188.
23. Q. Wang, W. Hou, S. Li, J. Xie, J. Li, Y. Zhou, J. Wang, *Green Chemistry*, **2017**, 19, 3820-3830.
24. W. Gong, K. Zheng, P. Ji, *RSC Advances*, **2017**, 7, 34776-34782.
25. J. Cai, H. Ma, J. Zhang, Q. Song, Z. Du, Y. Huang, J. Xu, *Chemistry—A European Journal*, **2013**, 19, 14215-14223.
26. C. Zhou, W. Deng, X. Wan, Q. Zhang, Y. Yang, Y. Wang, *ChemCatChem*, **2015**, 7, 2853-2863.
